# Supplementary material for: Inflammation leads through PGE/EP 3 signaling to HDAC5/MEF2‐dependent transcription in cardiac myocytes
Source: PubMed Central journal article supplement (PMC6034133; doi:10.15252/emmm.201708536), 2018-06-15
Supplement: EMMM-10-e8536-s001.pdf [file EMMM-10-e8536-s001.pdf]

## **Inflammation leads through PGE/EP<sub>3</sub> signaling to HDAC5/MEF2-dependent transcription in cardiac myocytes**

András D. Tóth<sup>1,2,\*</sup>, Richard Schell<sup>1,3,\*</sup>, Magdolna Lévy<sup>4</sup>, Christiane Vettel<sup>4</sup>, Philipp Theis<sup>1</sup>, Clemens Haslinger<sup>1</sup>, Felix Alban<sup>1</sup>, Stefanie Werhahn<sup>1</sup>, Lina Frischbier<sup>1</sup>, Jutta Krebs-Haupenthal<sup>1</sup>, Dominique Thomas<sup>5</sup>, Hermann-Josef Gröne<sup>6</sup>, Metin Avkiran<sup>7</sup>, Hugo A. Katus<sup>3</sup>, Thomas Wieland<sup>4,\*</sup> & Johannes Backs<sup>1,\*#</sup>

<sup>1</sup> Department of Molecular Cardiology and Epigenetics, Heidelberg University, Heidelberg, Germany; and DZHK (German Centre for Cardiovascular Research), partner site Heidelberg/Mannheim, Germany

<sup>2</sup> Department of Physiology, Faculty of Medicine, Semmelweis University, Budapest, Hungary

<sup>3</sup> Department of Cardiology, Heidelberg University, Germany; and DZHK (German Centre for Cardiovascular Research), partner site Heidelberg/Mannheim, Germany

<sup>4</sup> Experimental Pharmacology, European Center of Angioscience, Medical Faculty Mannheim, Heidelberg University, Mannheim, Germany; and DZHK (German Centre for Cardiovascular Research), partner site Heidelberg/Mannheim, Germany

<sup>5</sup> Institute of Clinical Pharmacology, Goethe-University Frankfurt, Frankfurt, Germany

<sup>6</sup> Department of Cellular and Molecular Pathology, German Cancer Research Center, Im Neuenheimer Feld 280, 69120 Heidelberg, Germany

<sup>7</sup> Cardiovascular Division, King's College London British Heart Foundation Centre of Research Excellence, The Rayne Institute, St Thomas' Hospital, London SE1 7EH, United Kingdom

\* These authors contributed equally.

# Corresponding Author

Prof. Dr. med. Johannes Backs  
Department Molecular Cardiology and Epigenetics  
University Hospital Heidelberg  
Im Neuenheimer Feld 669  
69120 Heidelberg  
Tel.: +49 6221 56-35271  
Email: [Johannes.backs@med.uni-heidelberg.de](mailto:Johannes.backs@med.uni-heidelberg.de)

## Table of Content

|                                                                                                              |   |
|--------------------------------------------------------------------------------------------------------------|---|
| <b>Appendix Table S1</b> – Concentrations, descriptions and supporting references of the used compounds..... | 2 |
| <b>Appendix Table S2</b> – The used primer sequences for quantitative real-time PCR .....                    | 3 |
| <b>References</b> .....                                                                                      | 3 |

**Appendix Table S1** – Concentrations, descriptions and supporting references of the used compounds.

| <b>Compound<br/>(used concentration)</b>       | <b>Description with reference</b>                                                                                                                                                                                                                                       |
|------------------------------------------------|-------------------------------------------------------------------------------------------------------------------------------------------------------------------------------------------------------------------------------------------------------------------------|
| <b><u>L798106</u><br/>(200 nM)</b>             | Potent and highly selective EP <sub>3</sub> receptor antagonist (K <sub>i</sub> values are 0.3, 916, > 5000 and > 5000 nM at EP <sub>3</sub> , EP <sub>4</sub> , EP <sub>1</sub> and EP <sub>2</sub> receptors, respectively) (Clarke et al, 2004; Juteau et al, 2001). |
| <b><u>L161,982</u><br/>(2 μM)</b>              | Potent and selective EP <sub>4</sub> receptor antagonist (K <sub>i</sub> values are 32, 7100, 5800, 6100 nM for rat EP <sub>4</sub> , EP <sub>3</sub> , EP <sub>2</sub> and EP <sub>1</sub> receptors, respectively) (Balzary et al, 2006; Machwate et al, 2001).       |
| <b><u>AH6809</u><br/>(10 μM)</b>               | EP <sub>1</sub> (pA <sub>2</sub> = 6.8) and EP <sub>2</sub> (K <sub>i</sub> = 350 nM) receptor antagonist (Kiriya et al, 1997).                                                                                                                                         |
| <b><u>Bisindolylmaleimide I</u><br/>(3 μM)</b> | Selective inhibitor of protein kinase C. IC <sub>50</sub> values are 0.0084, 0.0180, 0.210, 0.132, and 5.8 μM for α, β1, δ, ε and ζ PKC isoforms, respectively (Jacobson et al, 1995; Martiny-Baron et al, 1993).                                                       |
| <b><u>PTX</u><br/>(100 ng/ml)</b>              | Bacterial toxin that inhibits G <sub>i/o</sub> and G <sub>t</sub> via catalyzation of ADP-ribosylation (Vettel et al, 2012).                                                                                                                                            |
| <b><u>NSC 23766</u><br/>(100 μM)</b>           | Selective inhibitor of Rac1 activation by preventing Rac1-GEF (TrioN and Tiam1, IC <sub>50</sub> ~ 50 μM) interaction (Gao et al, 2004; Levay et al, 2013; Vettel et al, 2012).                                                                                         |
| <b><u>SQ 22536</u><br/>(100 μM)</b>            | Cell-permeable adenylate cyclase inhibitor (Harris et al, 1979; Mitra et al, 2006).                                                                                                                                                                                     |
| <b><u>AIP</u><br/>(1 μM)</b>                   | Selective and potent CaMKII inhibitor (IC <sub>50</sub> : 40 nM) (Ishida et al, 1995).                                                                                                                                                                                  |
| <b><u>BPKDi</u><br/>(3 μM)</b>                 | Selective inhibitor of the three PKD isoforms with low nanomolar potency but it failed to inhibit members of the CaMKII and MARK families or SIK1 and GRK5 (Haworth et al, 2012; Meredith et al, 2010; Monovich et al, 2010).                                           |
| <b><u>IPA-3</u><br/>(30 μM)</b>                | A selective small-molecule inhibitor that targets the autoregulatory mechanism of group 1 PAKs (PAK1,2,3) and promotes their inactive conformation. Group 1 PAKs were shown to be inhibited at 10 μM (Deacon et al, 2008; Vettel et al, 2012).                          |

**Appendix Table S2** – The used primer sequences for quantitative real-time PCR

| <b>Gene</b>                   |           | <b>Primer sequence</b>       |
|-------------------------------|-----------|------------------------------|
| <i>IL6</i>                    | sense     | 5'-gatggatgctaccaaactggat-3' |
|                               | antisense | 5'-ccaggtagctatggactccaga-3' |
| <i>TNF<math>\alpha</math></i> | sense     | 5'-ctgtagcccacgtcgtagc-3'    |
|                               | antisense | 5'-ttgagatccatgccgttg-3'     |
| <i>Nur77</i>                  | sense     | 5'-tgttgatgttctgcctttg-3'    |
|                               | antisense | 5'-ggaggccatgtcgatcag-3'     |
| <i>Myomaxin</i>               | sense     | 5'-tctcctagaggcgctgtcc-3'    |
|                               | antisense | 5'-tgcacaagtctgattcttccat-3' |
| <i>AdamTS1</i>                | sense     | 5'-aaaggcattggctacttctttg-3' |
|                               | antisense | 5'-ggactacagggagtgccatc-3'   |
| <i>ANP</i>                    | sense     | 5'-cacagatctgatggattcaaga-3' |
|                               | antisense | 5'-cctcatcttctaccggcatc-3'   |
| <i>BNP</i>                    | sense     | 5'-gtcagtcgcttgggctft-3'     |
|                               | antisense | 5'-ccagagctggggaagaag-3'     |
| <i>18S</i>                    | sense     | 5'-gcaattattcccatgaacg-3'    |
|                               | antisense | 5'-gggacttaatcaacgcaagc-3'   |

## References

- Balzary RW, Cocks TM (2006) Lipopolysaccharide induces epithelium- and prostaglandin E(2)-dependent relaxation of mouse isolated trachea through activation of cyclooxygenase (COX)-1 and COX-2. *The Journal of pharmacology and experimental therapeutics* 317: 806-812
- Clarke DL, Giembycz MA, Patel HJ, Belvisi MG (2004) E-ring 8-isoprostanes inhibit ACh release from parasympathetic nerves innervating guinea-pig trachea through agonism of prostanoid receptors of the EP3-subtype. *British journal of pharmacology* 141: 600-609
- Deacon SW, Beeser A, Fukui JA, Rennefahrt UE, Myers C, Chernoff J, Peterson JR (2008) An isoform-selective, small-molecule inhibitor targets the autoregulatory mechanism of p21-activated kinase. *Chemistry & biology* 15: 322-331
- Gao Y, Dickerson JB, Guo F, Zheng J, Zheng Y (2004) Rational design and characterization of a Rac GTPase-specific small molecule inhibitor. *Proceedings of the National Academy of Sciences of the United States of America* 101: 7618-7623
- Harris DN, Asaad MM, Phillips MB, Goldenberg HJ, Antonaccio MJ (1979) Inhibition of adenylate cyclase in human blood platelets by 9-substituted adenine derivatives. *Journal of cyclic nucleotide research* 5: 125-134
- Haworth RS, Stathopoulou K, Candasamy AJ, Avkiran M (2012) Neurohormonal regulation of cardiac histone deacetylase 5 nuclear localization by phosphorylation-dependent and phosphorylation-independent mechanisms. *Circulation research* 110: 1585-1595
- Ishida A, Kameshita I, Okuno S, Kitani T, Fujisawa H (1995) A novel highly specific and potent inhibitor of calmodulin-dependent protein kinase II. *Biochemical and biophysical research communications* 212: 806-812

- Jacobson PB, Kuchera SL, Metz A, Schachtele C, Imre K, Schrier DJ (1995) Anti-inflammatory properties of Go 6850: a selective inhibitor of protein kinase C. *The Journal of pharmacology and experimental therapeutics* 275: 995-1002
- Juteau H, Gareau Y, Labelle M, Sturino CF, Sawyer N, Tremblay N, Lamontagne S, Carriere MC, Denis D, Metters KM (2001) Structure-activity relationship of cinnamic acylsulfonamide analogues on the human EP3 prostanoid receptor. *Bioorganic & medicinal chemistry* 9: 1977-1984
- Kiriyama M, Ushikubi F, Kobayashi T, Hirata M, Sugimoto Y, Narumiya S (1997) Ligand binding specificities of the eight types and subtypes of the mouse prostanoid receptors expressed in Chinese hamster ovary cells. *British journal of pharmacology* 122: 217-224
- Levay M, Krobert KA, Wittig K, Voigt N, Bermudez M, Wolber G, Dobrev D, Levy FO, Wieland T (2013) NSC23766, a widely used inhibitor of Rac1 activation, additionally acts as a competitive antagonist at muscarinic acetylcholine receptors. *The Journal of pharmacology and experimental therapeutics* 347: 69-79
- Machwate M, Harada S, Leu CT, Seedor G, Labelle M, Gallant M, Hutchins S, Lachance N, Sawyer N, Slipetz D et al (2001) Prostaglandin receptor EP(4) mediates the bone anabolic effects of PGE(2). *Molecular pharmacology* 60: 36-41
- Martiny-Baron G, Kazanietz MG, Mischak H, Blumberg PM, Kochs G, Hug H, Marme D, Schachtele C (1993) Selective inhibition of protein kinase C isozymes by the indolocarbazole Go 6976. *The Journal of biological chemistry* 268: 9194-9197
- Meredith EL, Beattie K, Burgis R, Capparelli M, Chapo J, Dipietro L, Gamber G, Enyedy I, Hood DB, Hosagrahara V et al (2010) Identification of potent and selective amidobipyridyl inhibitors of protein kinase D. *J Med Chem* 53: 5422-5438
- Mittra S, Bourreau JP (2006) Gs and Gi coupling of adrenomedullin in adult rat ventricular myocytes. *American journal of physiology Heart and circulatory physiology* 290: H1842-1847
- Monovich L, Vega RB, Meredith E, Miranda K, Rao C, Capparelli M, Lemon DD, Phan D, Koch KA, Chapo JA et al (2010) A novel kinase inhibitor establishes a predominant role for protein kinase D as a cardiac class IIa histone deacetylase kinase. *FEBS Lett* 584: 631-637
- Vettel C, Wittig K, Vogt A, Wuertz CM, El-Armouche A, Lutz S, Wieland T (2012) A novel player in cellular hypertrophy: Gibetagama/PI3K-dependent activation of the RacGEF TIAM-1 is required for alpha(1)-adrenoceptor induced hypertrophy in neonatal rat cardiomyocytes. *Journal of molecular and cellular cardiology* 53: 165-175
