# Supplementary material for: Inflammation leads through PGE/EP 3 signaling to HDAC5/MEF2‐dependent transcription in cardiac myocytes
Source: PubMed Central journal article supplement (PMC6034133; doi:10.15252/emmm.201708536), 2018-06-15
Supplement: EMMM-10-e8536-s002.pdf [file EMMM-10-e8536-s002.pdf]

## Expanded View Figures

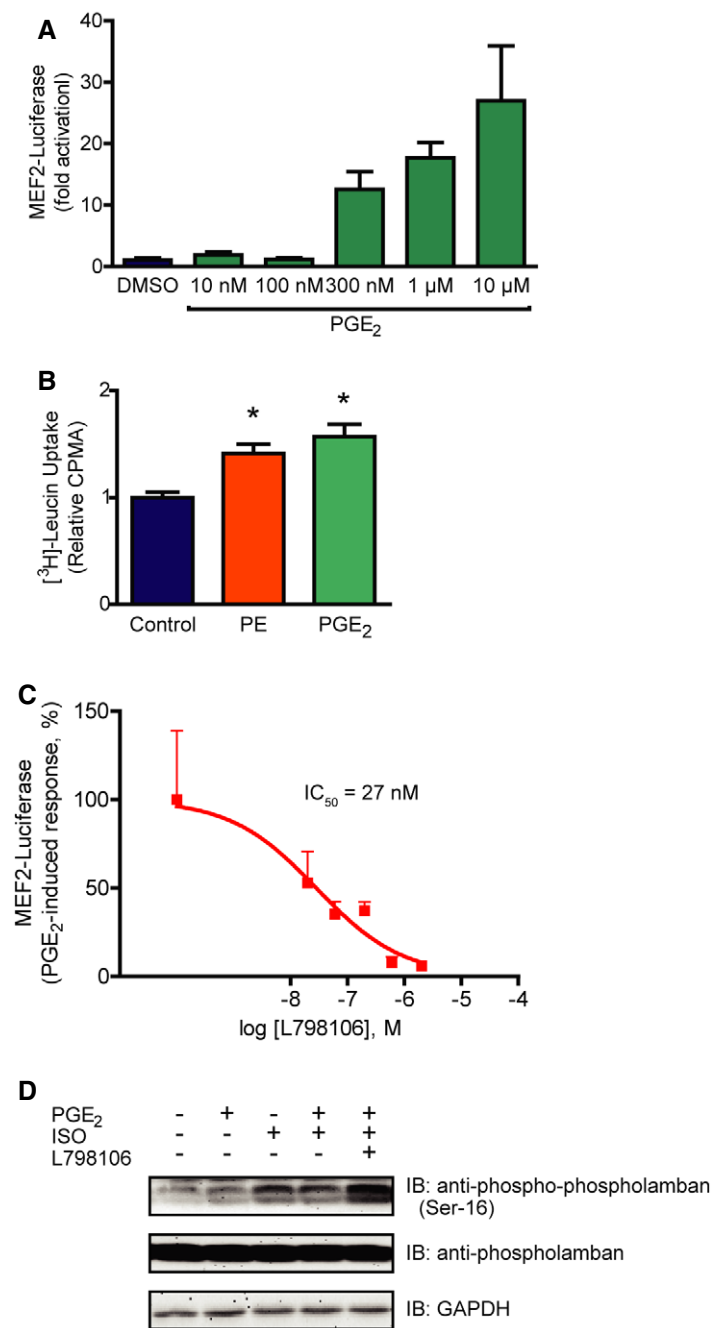

**Figure EV1. PGE<sub>2</sub> activates MEF2 via the G<sub>i/o</sub> protein-coupled EP<sub>3</sub> receptor.**

**A** Concentration dependency of the PGE<sub>2</sub>-triggered MEF2 activity. MEF2 activity was assessed in 3xMEF2-Luc-infected NRVMs upon 24-h stimulation with increasing concentration of PGE<sub>2</sub>.

**B** PGE<sub>2</sub> induces protein synthesis in NRVMs. After serum starvation, NRVMs were treated with media containing 1 μCi/ml [<sup>3</sup>H]-leucine and 100 μM PE or 10 μM PGE<sub>2</sub> for 24 h. Thereafter, the cellular [<sup>3</sup>H]-content was detected.

**C** Concentration-dependent effect of L798106 on the PGE<sub>2</sub>-induced MEF2 activation. MEF2 activity was determined in 3xMEF2-Luc-expressing NRVMs pretreated with increasing concentration of L798106 for 20 min and treated with DMSO or 1 μM PGE<sub>2</sub> for 24 h. The PGE<sub>2</sub>-induced response was calculated by subtracting the MEF2-luciferase activity measured in vehicle-treated cells from the PGE<sub>2</sub>-induced response in the case of all L798106 concentrations.

**D** L798106 inhibits the G<sub>i/o</sub> protein-coupled receptor of PGE<sub>2</sub>. To prove that L798106 inhibits EP<sub>3</sub> receptor, a cAMP signal-decreasing receptor, we assessed the phosphorylation of phospholamban at a target site (Ser-16) of protein kinase A, a well-known cAMP-regulated kinase. NRVMs were pretreated with 200 nM L798106 for 20 min, then with 100 nM PGE<sub>2</sub> for 2 min. The β-adrenergic receptor agonist isoproterenol (ISO, 10 nM) was used to induce a cAMP signal. Phosphorylation of phospholamban was detected by immunoblot. In the presence of the EP<sub>3</sub> receptor inhibitor, PGE<sub>2</sub> elevated the ISO-induced phosphorylation of phospholamban, showing that L798106 inhibits the cAMP-decreasing effect of PGE<sub>2</sub>.

Data information: Values are mean ± s.e.m. In (A) and (C), *n* = 4, technical replicates; curve was fitted and half maximal inhibitory concentration (IC<sub>50</sub> = 27 nM) was determined using GraphPad Prism. In (B), *n* = 9, independent experiments. \**P* < 0.05 vs. control, Student's two-tailed unpaired *t*-test (PE, *P* = 0.0008; PGE<sub>2</sub>, *P* = 0.0005). The exact *n* and *P*-values can also be found in the Source Data Excel file for Fig EV1. Source data are available online for this figure.

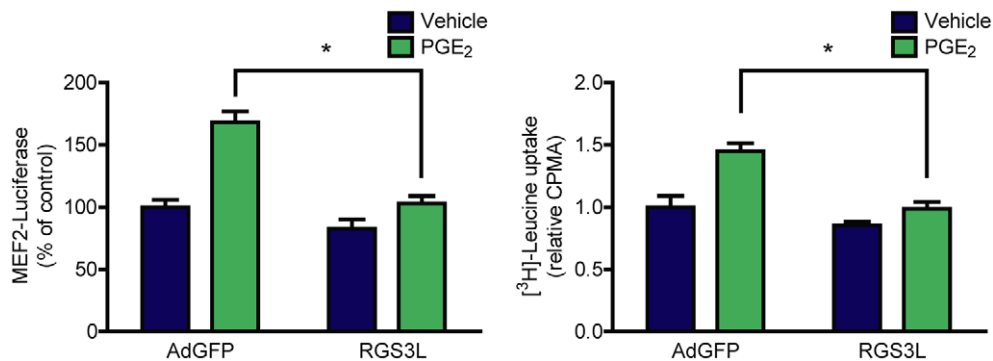

**Figure EV2. The PGE<sub>2</sub>-induced MEF2 activity and protein synthesis is abolished by overexpression of the βγ-scavenger RGS3L.**

Left panel: NRVMs were infected on the first day with 3xMEF2-Luc, on the next day with adenovirus encoding EGFP or RGS3L, then were serum starved. 24-h vehicle or 1 μM PGE<sub>2</sub> stimuli were used. Overexpression RGS3L prevented the PGE<sub>2</sub>-induced response. Right panel: After infection with adenovirus encoding EGFP or RGS3L, NRVMs were starved, then treated with vehicle or 1 μM PGE<sub>2</sub> in media containing 1 μCi/ml [<sup>3</sup>H]-leucine for 24 h. Thereafter, [<sup>3</sup>H]-leucine uptake was assessed. RGS3L counteracted the effect of PGE<sub>2</sub>. Values are mean + s.e.m., n = 3–4, technical replicates, two-way ANOVA, \*means significant interaction between RGS3L overexpression and the effect of PGE<sub>2</sub>, P < 0.05 (MEF2 activity: P = 0.007, [<sup>3</sup>H]-leucine uptake: P = 0.0393). The exact n and P-values can also be found in the Source Data Excel file for Fig EV2.

Source data are available online for this figure.

Adult mouse ventricular myocytes

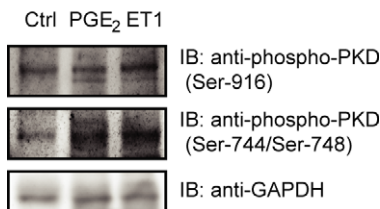

**Figure EV3. PGE<sub>2</sub> triggers phosphorylation of PKD in adult mouse ventricular myocytes.**

Adult mouse ventricular myocytes were serum starved for 4 h and treated with 1 μM PGE<sub>2</sub> or 100 nM ET1 for 4 h. Phosphorylation of PKD was assessed by immunoblot. Representative images are shown.

Source data are available online for this figure.

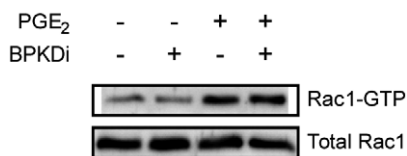

**Figure EV4. PGE<sub>2</sub>-induced Rac1 activation does not involve PKD.**

Serum-starved NRVMs were treated with 3 μM BPKDi prior to stimulation. After treatment with 10 μM PGE<sub>2</sub> for 2 min, Rac1 activation was determined by effector pull-down assay. Representative image from three independent experiments.

Source data are available online for this figure.
